# Supplementary material for: Dimerization of a marginally stable disilenyl germylene to tricyclic systems: evidence for reversible NHC-coordination
Source: Royal Society of Chemistry journal article supplement (doi:10.1039/c5cc09878e), 2016-01-01
Supplement: c5cc09878e1.pdf [file c5cc09878e1.pdf]

## Supporting Information

### **Dimerization of a marginally stable disilenyl germylene to tricyclic systems: evidence for reversible NHC-coordination**

David Nieder<sup>a</sup>, Cem B. Yildiz<sup>b</sup>, Anukul Jana<sup>a,c</sup>, Michael Zimmer<sup>a</sup>, Volker Huch<sup>a</sup>  
and David Scheschkewitz<sup>a\*</sup>

#### Contents

|                          |     |
|--------------------------|-----|
| 1. Experimental details  | S2  |
| 2. Plots of NMR spectra  | S6  |
| 3. X-ray data            | S14 |
| 4. Computational details | S16 |
| 5. References            | S23 |

---

<sup>a</sup> *Krupp-Chair of General and Inorganic Chemistry, Saarland University, 66125 Saarbrücken, Germany*

<sup>b</sup> *Department of Chemistry, Faculty of Science and Letters, Aksaray University, 68100 Aksaray, Turkey*

<sup>c</sup> *New address: Tata Institute of Fundamental Research Centre for Interdisciplinary Sciences 21, Brundavan Colony, Narsingi, Hyderabad-500075, India*

E-mail: scheschkewitz@mx-uni-saarland.de

# 1. Experimental Details

All experiments were carried out under a protective atmosphere of argon applying standard Schlenk or glove-box techniques. Solvents were refluxed over sodium/benzophenone, distilled and stored under argon. [D<sub>6</sub>]-benzene and [D<sub>8</sub>]-toluene were dried over potassium, refluxed and distilled under argon. The silagermenylidene **5** is synthesised according to our published procedure.<sup>1</sup> MeLi solutions (1.6 M in diethylether and 3.0 M in diethoxymethane, DEM) were purchased from Sigma Aldrich and used as received. <sup>1</sup>H and <sup>13</sup>C NMR spectra were referenced to external SiMe<sub>4</sub> using the residual signals of the deuterated solvent (<sup>1</sup>H) or the solvent itself (<sup>13</sup>C). <sup>29</sup>Si{<sup>1</sup>H} NMR spectra were referenced to external SiMe<sub>4</sub>. Melting points were determined under argon in closed NMR tubes and are uncorrected. CHN analyses were measured on an Elementar Vario Micro Cube.

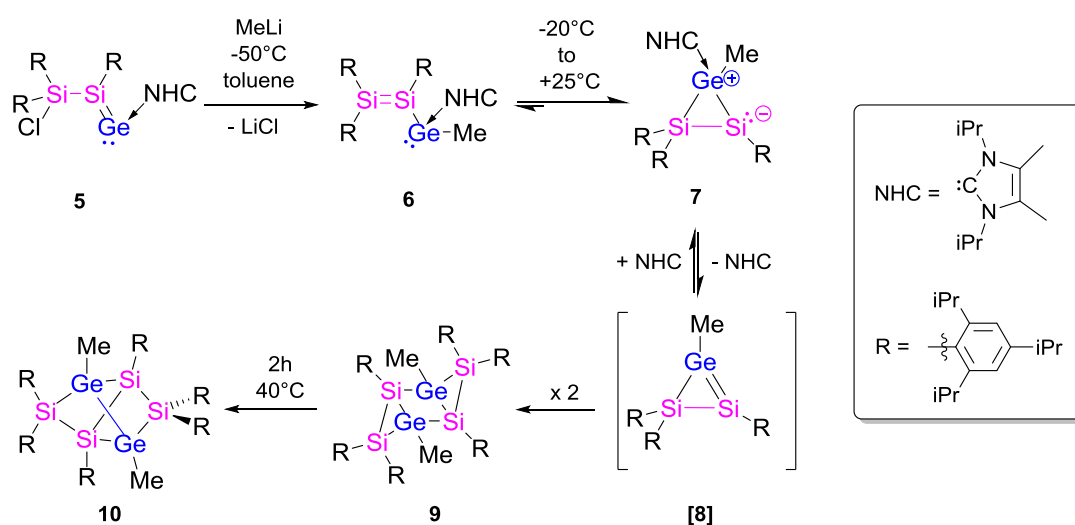

**Experiment 1:** Synthesis of 2,5-dimethyl-1,3,3,4,6,6-hexakis(2,4,6-triisopropylphenyl)-1,3,4,6-tetrasilal-2,5-digermatene[3.1.0.0<sup>2,4</sup>]hexane **9** and isolation of 4,5-dimethyl-1,2,3,3,6,6-hexakis(2,4,6-triisopropylphenyl)-1,2,3,6-tetrasilal-4,5-digermatene[2.2.0.0<sup>2,5</sup>]hexane **10**

A solution of MeLi (1.6 M in Et<sub>2</sub>O, 0.76 mL, 1.216 mmol, 1 eq) is added slowly (2 min) to a cold toluene solution (5 mL, -78 °C) of the silagermenylidene **5** (1.16 g, 1.215 mmol). The reaction mixture is allowed to warm to room temperature and the solvent is immediately evaporated. The red solid is dried in high vacuum for one hour and dissolved in *n*-pentane (20 mL). After filtration with a reverse frit, all volatiles were removed again and free NHC is sublimed from the crude product at 5x10<sup>-6</sup> mbar for 12 h at ambient temperature. The residue is dissolved in toluene and a very concentrated solution is stored at -26 °C. A few pale red crystals of compound **9** and a large amount of colourless crystals of **10** suitable for X-ray diffraction were obtained after three days alongside an unidentified impurity with an SiH bond (Figures S10 to S13).

Due to its instability in solution, we were unable to obtain a pure sample of **9** despite repeated attempts. Conversely, a pure sample of **10** can be obtained by heating the reaction mixture of **9** and **10** to 40 °C for 2 hours. Crystallisation from a saturated toluene solution at room temperature for one day affords colourless crystals of **10**. The total yield (3 crops) of **10** is 0.60 g (63 %).

Selected data of chair-like isomer **9** (extracted from spectra of mixtures with **10** and an unknown CH insertion product)

**<sup>1</sup>H NMR** (300.13 MHz, [D<sub>6</sub>]-benzene, 300 K): δ 5.57 (1H, SiH of unknown CH insertion product, <sup>1</sup>J<sub>HSi</sub> = 96 Hz) ppm.

**<sup>13</sup>C NMR** (75.56 MHz, [D<sub>6</sub>]-benzene, 300 K): δ 157.35, 157.08, 156.33, 155.89, 155.82, 155.12, 155.04, 151.02, 149.98, 149.65, 149.44, 135.37, 133.53, 131.13, 122.69, 121.46, 120.60 (ArC), 121.22 (NC(CH<sub>3</sub>)=C(CH<sub>3</sub>)N of free NHC), 49.84 (CH(CH<sub>3</sub>)<sub>2</sub> of free NHC), 36.98, 36.50, 34.97, 34.88, 34.81, 34.73, 34.37, 31.33 (CH(CH<sub>3</sub>)<sub>2</sub> of Tip), 29.04, 27.87, 26.62, 26.01, 25.86, 24.84, 24.49, 23.51 (CH(CH<sub>3</sub>)<sub>2</sub> of Tip), 24.64 (CH(CH<sub>3</sub>)<sub>2</sub> of free NHC), 8.39 (CH<sub>3</sub> of free NHC), 5.89 (GeCH<sub>3</sub>) ppm.

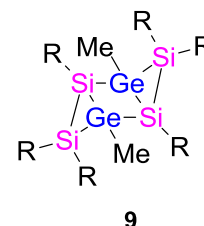

**<sup>29</sup>Si NMR** (59.62 MHz, [D<sub>6</sub>]-benzene, 300 K): δ -82.55 (**9**), -96.42 (**9**) and -65.94 (unknown CH insertion product; SiH, <sup>1</sup>J<sub>SiH</sub> = 96 Hz) ppm.

*Note:* Due to considerable overlap of the occasionally broad signals of **9** with those of **10** the <sup>1</sup>H NMR is beyond interpretation.

Data of doubly edge-capped tetrahedral isomer **10** (obtained from a pure crystalline sample)

**MP:** > 225°C

**<sup>1</sup>H NMR** (300.13 MHz, [D<sub>6</sub>]-benzene, 300 K): δ 7.13 (m, toluene), 7.11 (br, 5H, TipH), 7.06 (br, 4H, TipH), 7.02 (m, toluene), 6.92 (s, 3H, TipH), 4.43 (br, 3H, CH(CH<sub>3</sub>)<sub>2</sub> of Tip), 3.87-3.79 (m, 6H, CH(CH<sub>3</sub>)<sub>2</sub> of Tip), 3.20 (br, 4H, CH(CH<sub>3</sub>)<sub>2</sub> of Tip), 2.90-2.62 (m, 8H, CH(CH<sub>3</sub>)<sub>2</sub> of Tip), 2.11 (s, toluene), 1.46-1.30 (m, 42H, CH(CH<sub>3</sub>)<sub>2</sub> of Tip), 1.24-1.14 (m, 64H, CH(CH<sub>3</sub>)<sub>2</sub> of Tip), 0.35 (br, 12H, CH(CH<sub>3</sub>)<sub>2</sub> of Tip and GeCH<sub>3</sub>) ppm.

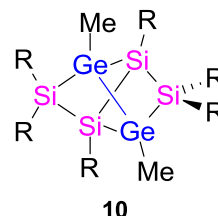

**<sup>13</sup>C NMR** (75.56 MHz, [D<sub>6</sub>]-benzene, 300 K): δ 156.66 (br), 154.73 (br), 154.25, 149.51, 149.38, 149.27, 139.12 (br), 135.32 (br) (ArC<sub>quant</sub>), 128.17 (masked by C<sub>6</sub>D<sub>6</sub>), 123.95, 123.72, 123.12, 122.83, 121.66 (br) (ArCH), 37.87 (br), 35.71, 35.62, 34.57, 34.48, 30.48 (CH(CH<sub>3</sub>)<sub>2</sub> of Tip), 28.70, 25.47, 25.19 (br), 24.95, 24.64, 24.14, 24.10, 23.96 (CH(CH<sub>3</sub>)<sub>2</sub> of Tip), 0.35 (GeCH<sub>3</sub>) ppm.

**<sup>29</sup>Si NMR** (59.62 MHz, [D<sub>6</sub>]-benzene, 300 K): δ 21.97, -37.74 ppm.

*Note:* Due to the broadness of the signals the <sup>29</sup>Si NMR signals cannot be assigned by a <sup>29</sup>Si-HMBC correlation.

**Element. anal.:** Calcd. for C<sub>92</sub>H<sub>144</sub>Ge<sub>2</sub>Si<sub>4</sub> · 1.5 C<sub>7</sub>H<sub>8</sub>: C, 74.80; H, 9.55. Found: C, 73.86; H, 9.79.

**Experiment 2:** Low temperature NMR study of the reaction of **5** with MeLi and preparation of a solution of NHC adduct of disilanyl germylene **6**

MeLi (3.0 M in DEM, 106  $\mu$ L, 0.318 mmol, 1 eq) was added to a cold solution ( $-78$   $^{\circ}$ C) of **5** (303 mg, 0.317 mmol) in  $[D_8]$ -toluene (2 mL) in a Schlenk-flask. One third of the solution was transferred via a pre-cooled glass pipette into a pre-cooled NMR-tube at  $-78$   $^{\circ}$ C (the remainder was stored at  $-78$   $^{\circ}$ C for use in experiments 3 and 4, see below).

The following distinct  $^{29}\text{Si}$  NMR spectra were obtained in the process of warming the sample to ambient temperature:

- at 213 K only starting material **5** with signals at  $\delta = 163.47$  and  $8.37$  ppm is observed (Figure S1a).
- at 253 K two new resonances at  $\delta = 90.07$  and  $85.40$  ppm appeared in the  $^{29}\text{Si}$  NMR which correspond to disilanyl germylene **6** (Figure S1c).
- after 30 h at room temperature the signals of **6** had completely disappeared and only resonances of **7** at  $\delta = -64.92$  and  $-66.51$  ppm and **9** at  $\delta = -82.55$  and  $-96.42$  ppm could be detected (Figure S1d).

Data of disilanyl germylene **6**

$^1\text{H}$  NMR (300.13 MHz,  $[D_8]$ -toluene, 253 K, TMS):  $\delta$  7.12-6.95 (m, 6H, overlap with toluene- $d_8$ , TipH), 5.70 (m, 2H,  $\text{CH}(\text{CH}_3)_2$  of NHC), 4.54 (s, 2H,  $\text{OCH}_2\text{O}$ , DEM), 4.12-3.91 (m, 5H,  $\text{CH}(\text{CH}_3)_2$  of Tip), 3.46 (q, 4H,  $\text{OCH}_2\text{CH}_3$ , DEM), 2.82-2.62 (m, 4H,  $\text{CH}(\text{CH}_3)_2$  of Tip), 1.65 (br, 3H,  $\text{GeCH}_3$ ) 1.51 (s, 6H,  $\text{CH}_3$  of NHC), 1.37-1.13 (m, 44H,  $\text{CH}(\text{CH}_3)_2$  of Tip and  $\text{CH}(\text{CH}_3)_2$  of NHC, overlap with DEM: t, 6H,  $\text{CH}_3$ ), 0.96-0.92 (m, 6H,  $\text{CH}(\text{CH}_3)_2$  of Tip), 0.84-0.70 (m, 18H,  $\text{CH}(\text{CH}_3)_2$  of Tip) ppm.

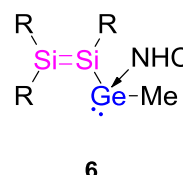

$^{13}\text{C}$  NMR (75.56 MHz,  $[D_8]$ -toluene, 253 K, TMS):  $\delta$  174.88 (NCN), 155.03, 154.39, 153.77, 153.50, 149.24, 148.91, 148.21, 138.92, 138.82, 137.98, 125.94, 122.26, 121.77, 121.40, 121.30, 121.06 (ArylC of Tip and  $\text{NC}(\text{CH}_3)=\text{C}(\text{CH}_3)\text{N}$  of NHC), 94.94 ( $\text{OCH}_2\text{O}$ , DEM), 62.91 ( $\text{OCH}_2\text{CH}_3$ , DEM), 52.09 ( $\text{CH}(\text{CH}_3)_2$  of NHC), 37.42, 37.02, 36.65, 34.92, 34.66, 34.47, 28.26, 26.13, 25.02, 24.55, 24.43, 24.34, 24.26, 24.19, 24.11, 21.54, 21.19, 20.06 ( $\text{CH}(\text{CH}_3)_2$  of Tip and  $\text{CH}(\text{CH}_3)_2$  of NHC), 15.43 ( $\text{OCH}_2\text{CH}_3$ , DEM), 9.91 ( $\text{NC}(\text{CH}_3)=\text{C}(\text{CH}_3)\text{N}$  of NHC), 4.07 ( $\text{GeCH}_3$ ) ppm.

$^{29}\text{Si}$  NMR (59.62 MHz,  $[D_8]$ -toluene, 253 K, TMS):  $\delta$  90.11, 85.29 ppm.

**Experiment 3:** Heating of a mixture of **6**, **7** and **9** to 323K in the absence of additional NHC

The following distinct  $^{29}\text{Si}$  NMR spectra were obtained in the process of warming the sample from 300 K to 323 K:

- warming of the sample to 300 K showed after 50 min three sets of signals in the  $^{29}\text{Si}$  NMR:  $\delta = 90.07$  and  $85.40$  ppm (**6**),  $\delta = -64.92$  and  $-66.51$  ppm (**7**) and  $\delta = -82.55$  and  $-96.42$  ppm (**9**) (Figure S2c).
- the temperature is increased to 323 K and two sets of signals were observed at  $\delta = -64.92$  and  $-66.51$  ppm (**7**) and  $\delta = -82.55$  and  $-96.42$  ppm (**9**) (Figure S2d).
- after 2 hours at 323 K only resonances at  $\delta = -64.92$  and  $-66.51$  ppm (**7**) and  $\delta = 21.97$ ,  $-37.74$  ppm (**10**) were observed (Figure S2e).

**Experiment 4:** NMR study of **6** with 3.8 equivalents of additional NHC and synthesis of intermediate **7** (NHC adduct of germadisilacyclopropene [**8**])

A cold solution of **6** (−48 °C) is added via syringe in a NMR tube containing NHC (3.8 eq) at room temperature:

- a  $^{29}\text{Si}$  NMR of the mixture of **6** and the free NHC was recorded at 300 K and only the signals of **6** were observed even after 50 min at ambient temperature (Figure S2a).
- the temperature was raised to 323 K and a nearly full conversion of **6** was reached after 1 hour at this temperature. The  $^{29}\text{Si}$  NMR indicated that the mixture predominantly contained **7** (Figure S2b, extracted data summarized below).
- a  $^1\text{H}$  NMR clearly shows that neither of compounds **9** and **10** are formed, even if the mixture is heated for 5 hours to 323 K (FigureS3b). Without additional NHC, **6** rearranges after 1h at 323 K to **7** and **9** (see  $^{29}\text{Si}$  NMR, figure S2d).

Data of NHC adduct **7** of germadisilacyclopropene

$^1\text{H}$  NMR (300.13 MHz,  $[\text{D}_8]$ -toluene, 323 K, TMS):  $\delta$  5.66 (sept,  $\text{CH}(\text{CH}_3)_2$  of NHC), 1.75 (s,  $\text{CH}(\text{CH}_3)_2$  of NHC) ppm.

$^{13}\text{C}$  NMR (75.56 MHz,  $[\text{D}_8]$ -toluene, 323 K, TMS):  $\delta$  175.90 (NCN), 156.65, 154.71, 154.45, 154.19, 149.41, 149.27, 149.15, 148.79, 147.72, 140.44, 135.53, 126.36, 123.82, 123.60, 122.75, 122.32, 122.00 (ArylC of Tip and  $\text{NC}(\text{CH}_3)=\text{C}(\text{CH}_3)\text{N}$  of NHC), 53.24 ( $\text{CH}(\text{CH}_3)_2$  of NHC), 36.54, 35.61, 35.52, 34.59, 34.36, 28.57, 25.49, 25.34, 25.16, 24.97, 24.83, 24.05, 23.92 ( $\text{CH}(\text{CH}_3)_2$  of Tip and  $\text{CH}(\text{CH}_3)_2$  of NHC), 10.66 ( $\text{NC}(\text{CH}_3)=\text{C}(\text{CH}_3)\text{N}$  of NHC), 1.68 ( $\text{GeCH}_3$ ) ppm.

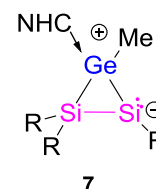

*Note:* The  $^1\text{H}$  and  $^{13}\text{C}$  NMR spectra of a relatively pure sample of **7** are dominated by the excess NHC used for the stabilization of this species. Therefore, only characteristic resonances of compound **7** are given due to significant overlaps with the dominating NHC and DEM signals.

$^{29}\text{Si}$  NMR (59.62 MHz,  $[\text{D}_8]$ -toluene, 323 K, TMS):  $\delta$  −64.73, −66.49 ppm.

## 2. Plots of NMR spectra

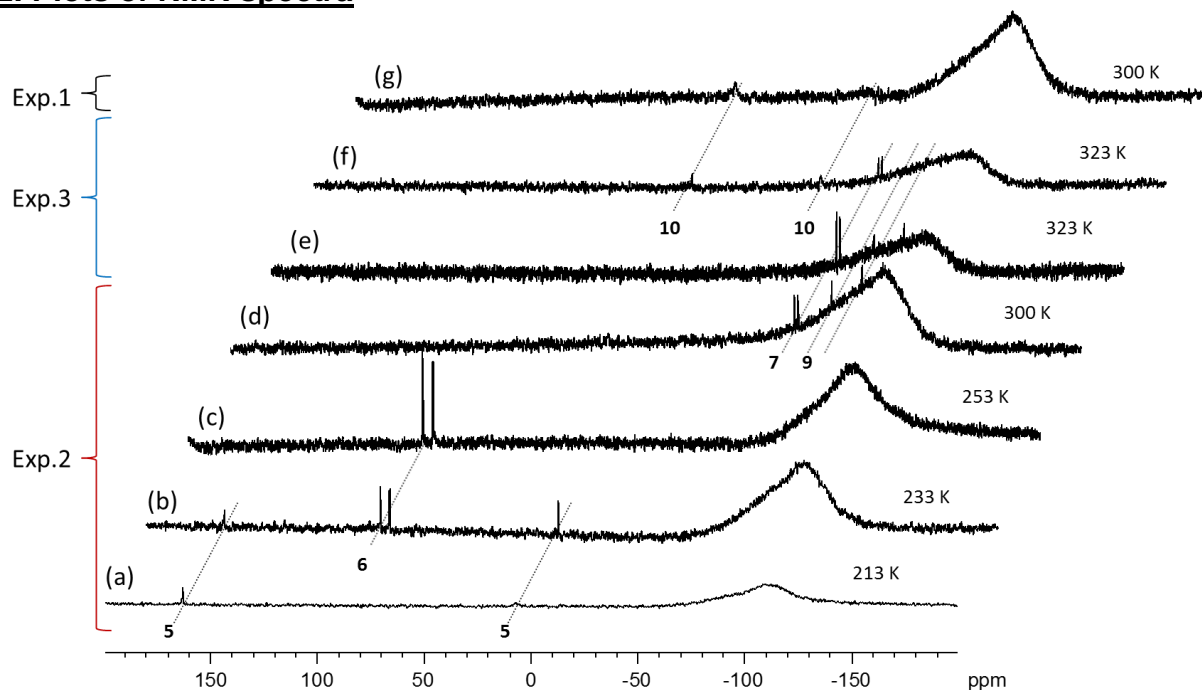

**Figure S1.** Stacked plot of  $^{29}\text{Si}$  NMR spectra of different VT-NMR experiments with identical starting conditions. Experiment 2: (a) starting material **5** at 213 K, (b) **5** and disilanyl germylene **6** at 233 K, (c) **6** at 253 K, (d) mixture of **7** and **9** after 30 h at 300 K. Experiment 3: (e) mixture of **7** and **9** after 1 h at 323 K, (f) mixture of **7** and doubly bridged tetrahedron **10** after 2 h at 323 K. Experiment 1: (g) **10** at 300 K (crystalline sample).

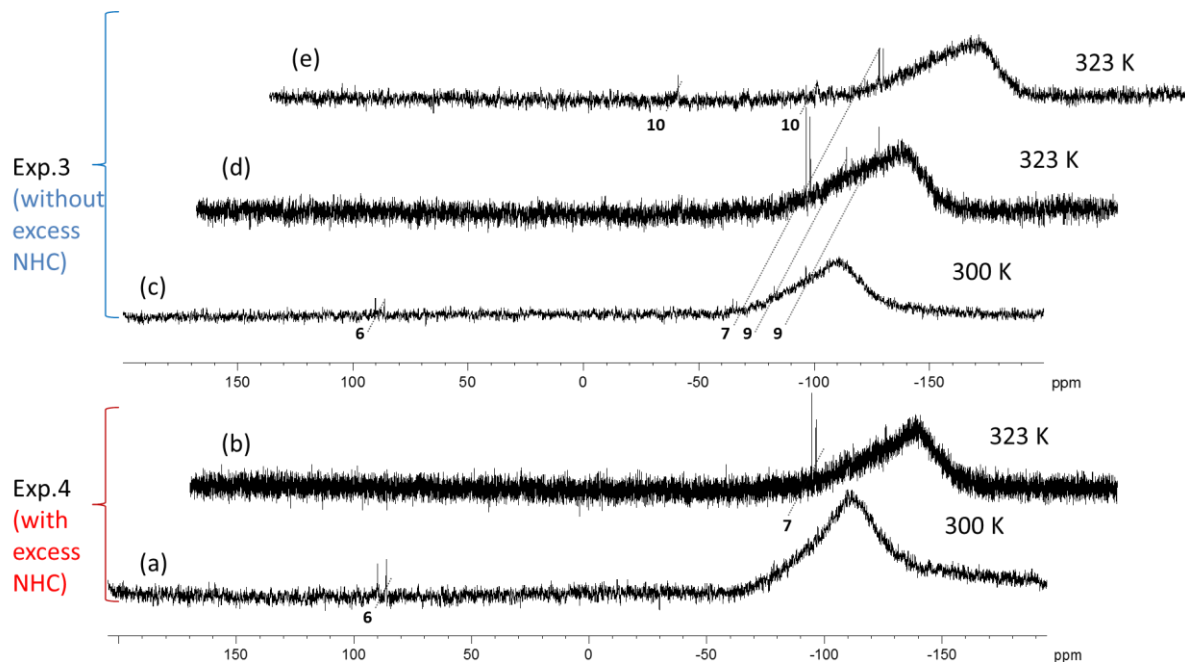

**Figure S2.** Stacked plots of  $^{29}\text{Si}$  NMR spectra of NMR experiments with or without added NHC. Experiment 4 with 3.8 eq of NHC: (a) after 50 min at 300 K **6** is still the major component, (b) after 1 h at 323 K clean conversion to **7** has occurred. Experiment 3 without added NHC: (c) after 50 min at 300 K a mixture of **6**, three-membered ring **7** and chair form of  $\text{Si}_4\text{Ge}_2\text{R}_6$  **9** is obtained, (d) after 1 h at 323 K a mixture of **7** and **9** is observed, (e) after 2 h at 323 K a mixture of **7** and  $\text{Si}_4\text{Ge}_2\text{R}_6$  doubly bridged tetrahedron **10** is observed.

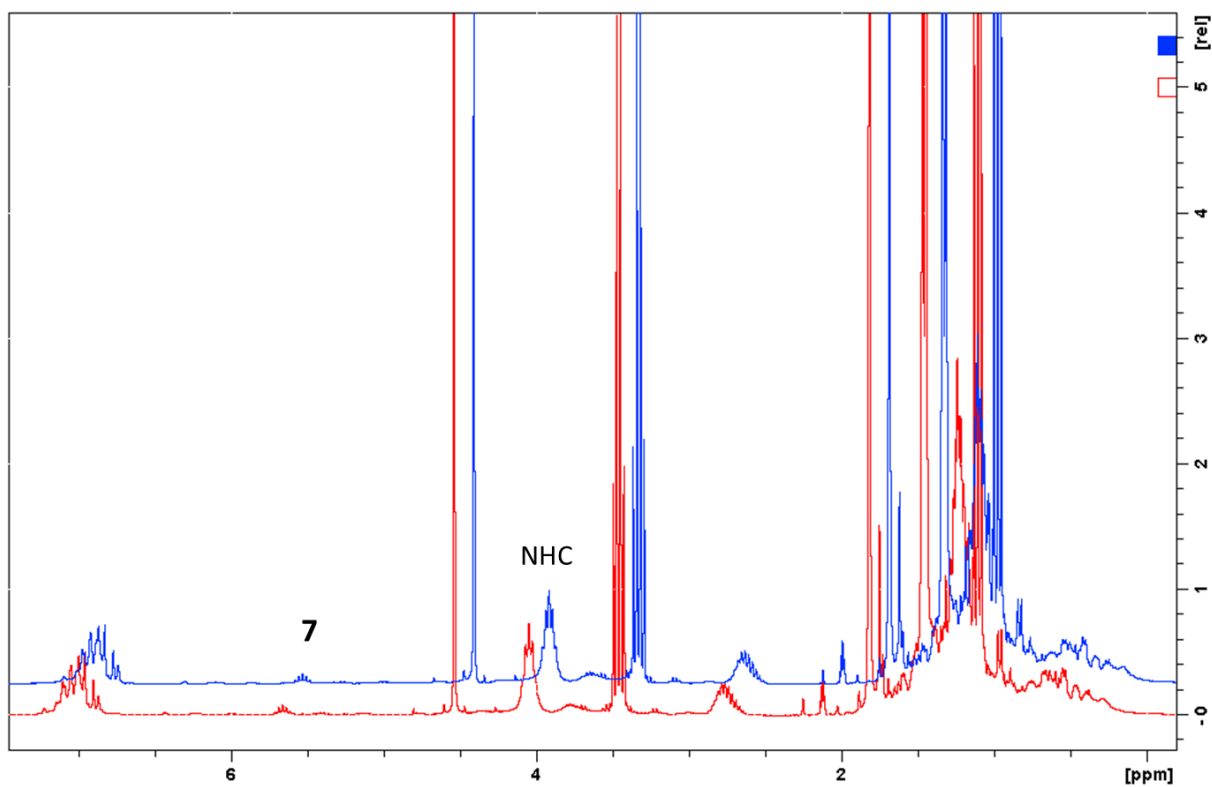

**Figure S3.**  $^1\text{H}$  NMR of **7** with 3.8 eq of NHC; **red**: after 1 h at 323 K, **blue**: after 5 h at 323 K; **7**: CH of isopropyl groups of coordinated NHC; NHC: CH of isopropyl groups of free NHC.

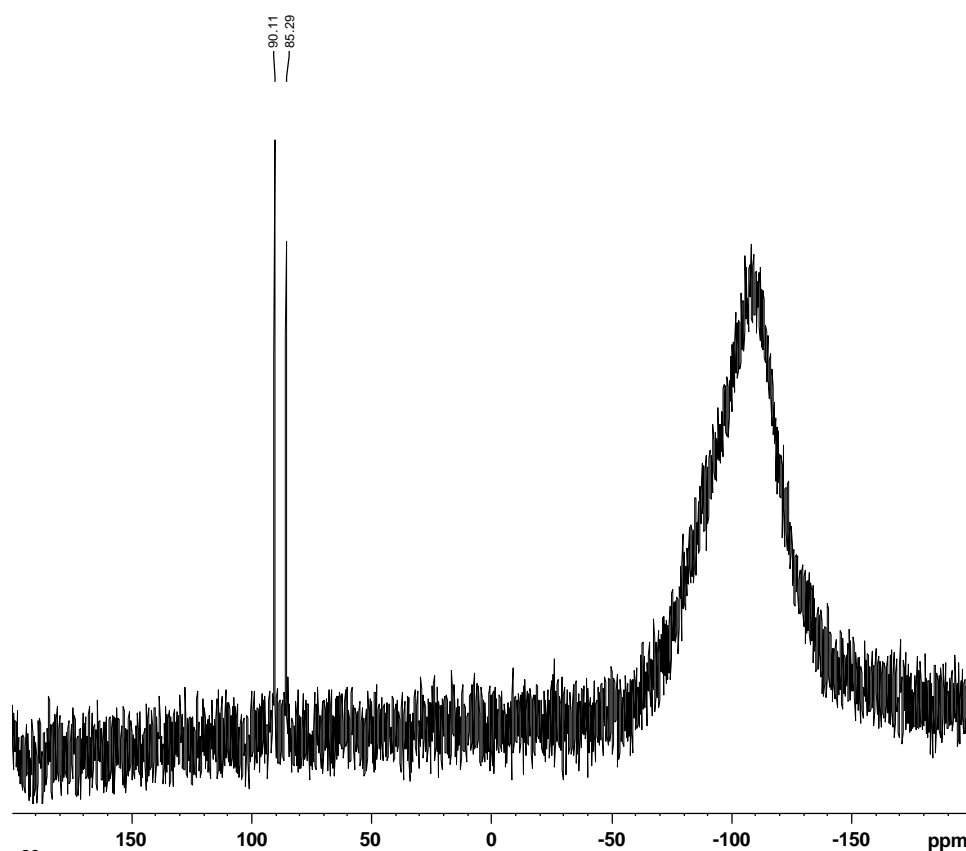

**Figure S4.**  $^{29}\text{Si}$  NMR of the low temperature NMR study: intermediate **6** in  $[\text{D}_8]$ -toluene at 253 K.

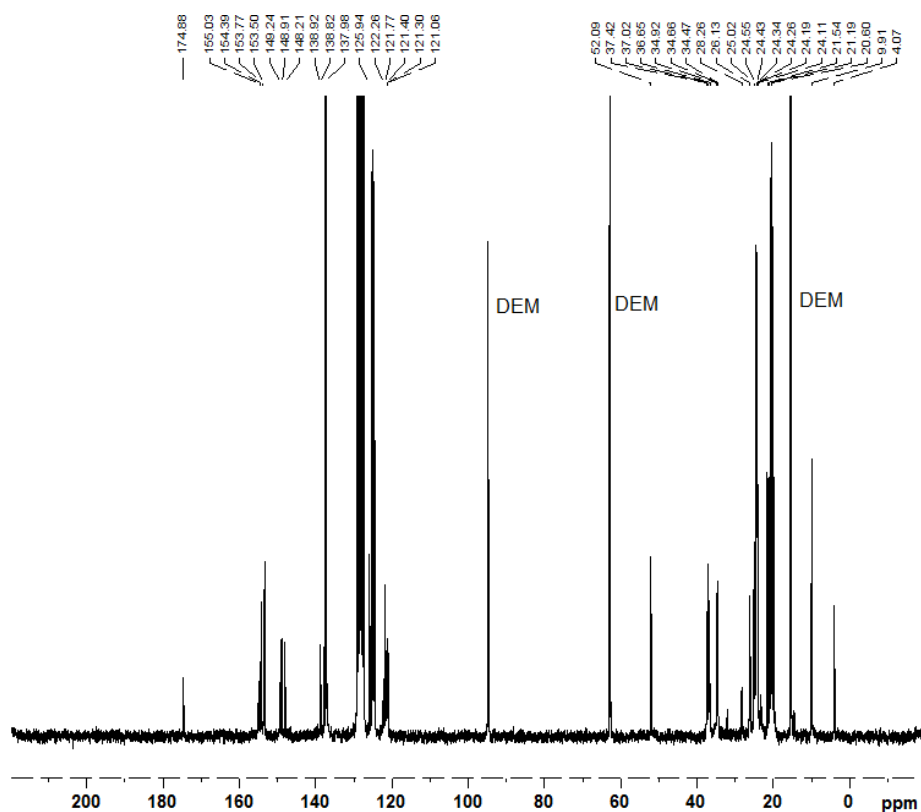

**Figure S5.**  $^{13}\text{C}$  NMR of the low temperature NMR study: intermediate **6** in  $[\text{D}_8]$ -toluene at 253 K (DEM: diethoxymethane).

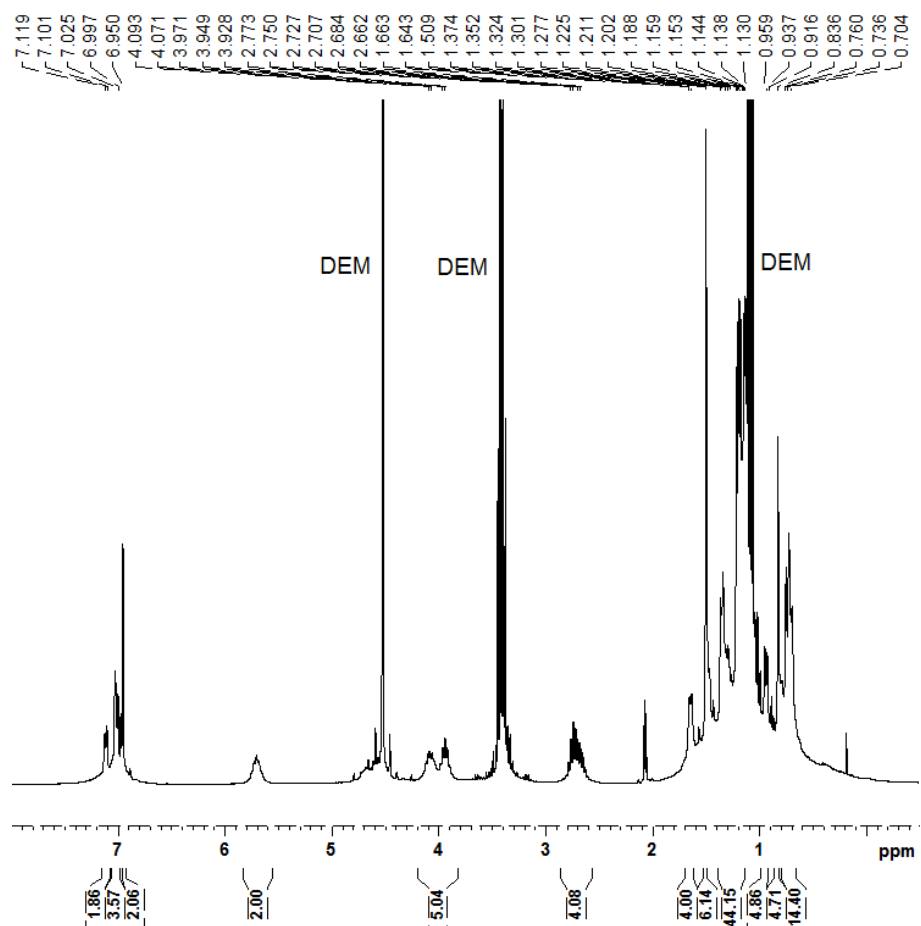

**Figure S6.**  $^1\text{H}$  NMR of the low temperature NMR study: proposed intermediate **6** in  $[\text{D}_8]$ -toluene at 253 K (DEM: diethoxymethane).



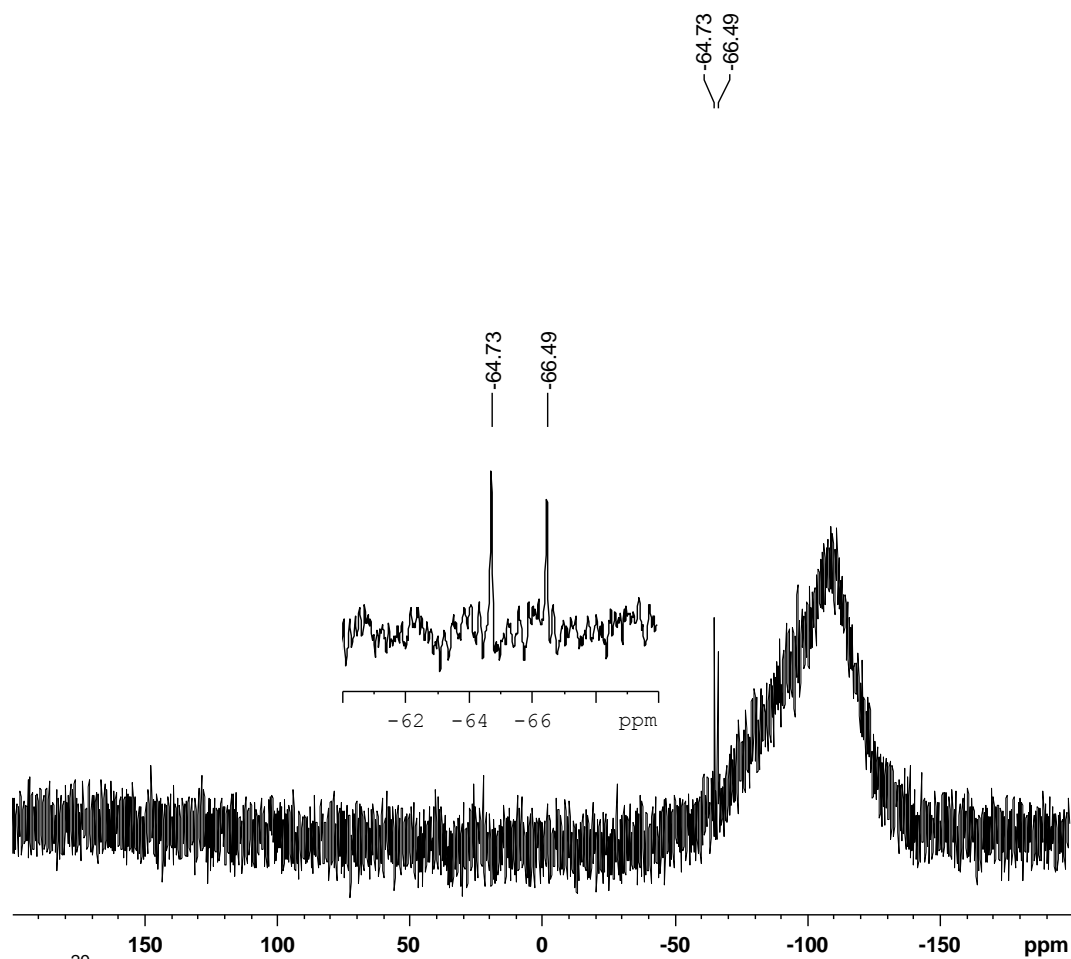

**Figure S7.** <sup>29</sup>Si NMR of **7** with 3.8 eq of NHC at in [D<sub>8</sub>]-toluene after 1 h at 323 K (Figure S2b)

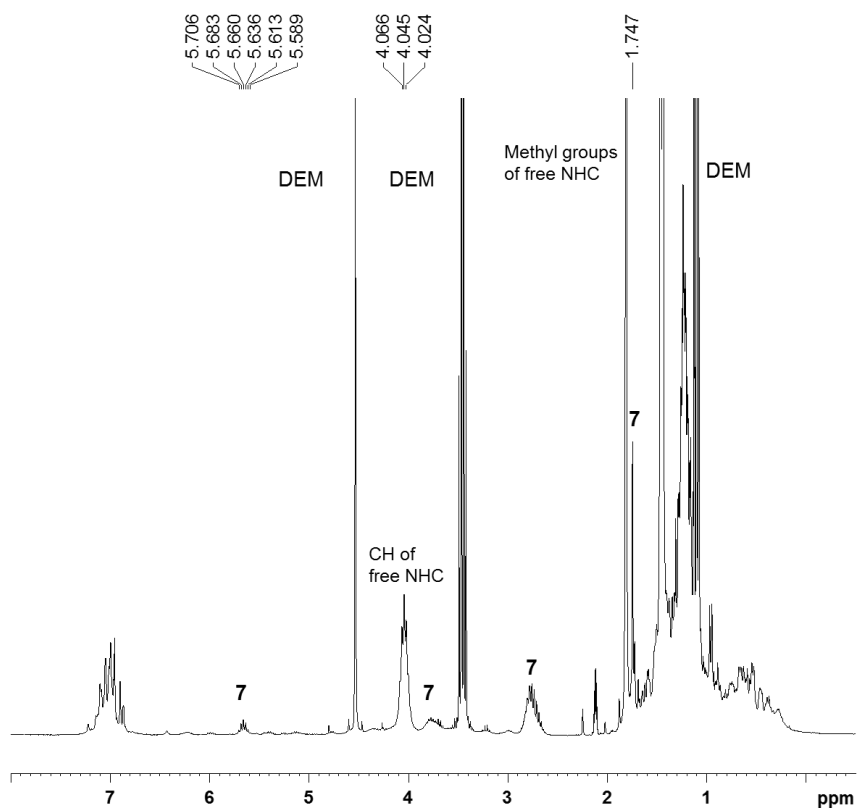

**Figure S8.** <sup>1</sup>H NMR of **7** with 3.8 eq of NHC at in [D<sub>8</sub>]-toluene after 1 h at 323 K; DEM: diethoxymethane. Selected characteristic signals of **7** are indicated.

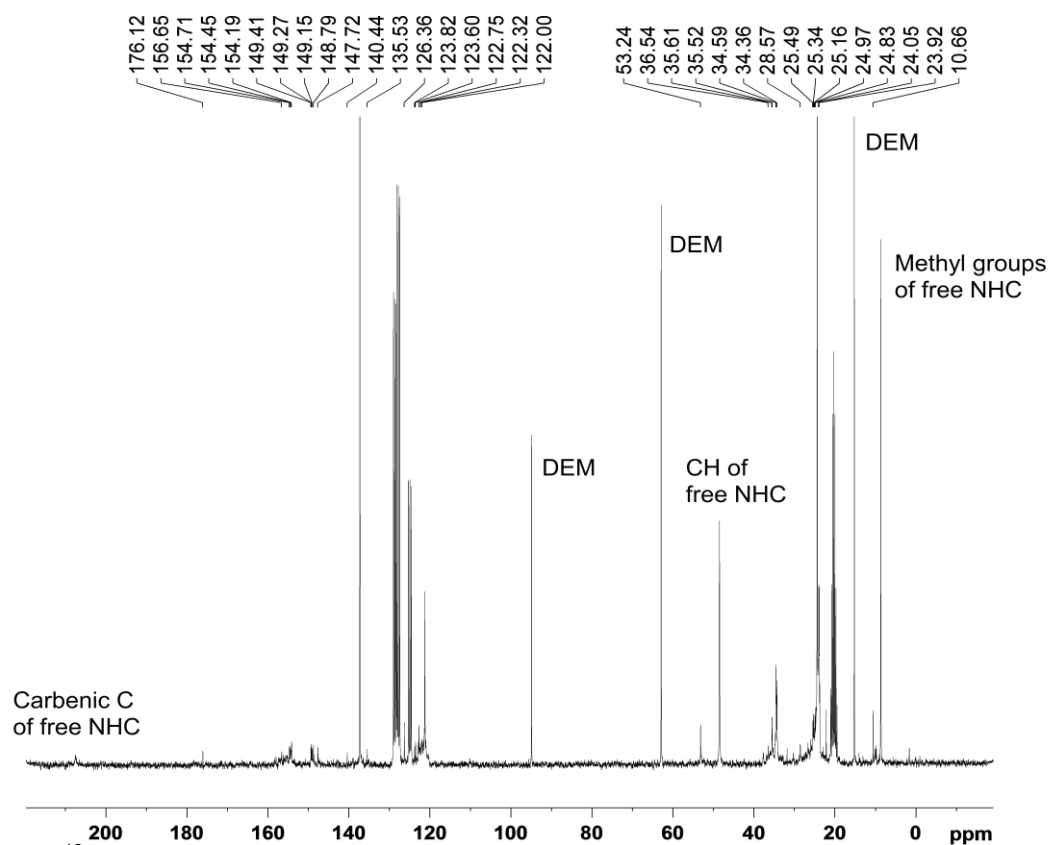

**Figure S9.**  $^{13}\text{C}$  NMR of **7** with 3.8 eq of NHC at in  $[\text{D}_8]$ -toluene after 1 h at 323 K; DEM: diethoxymethane.

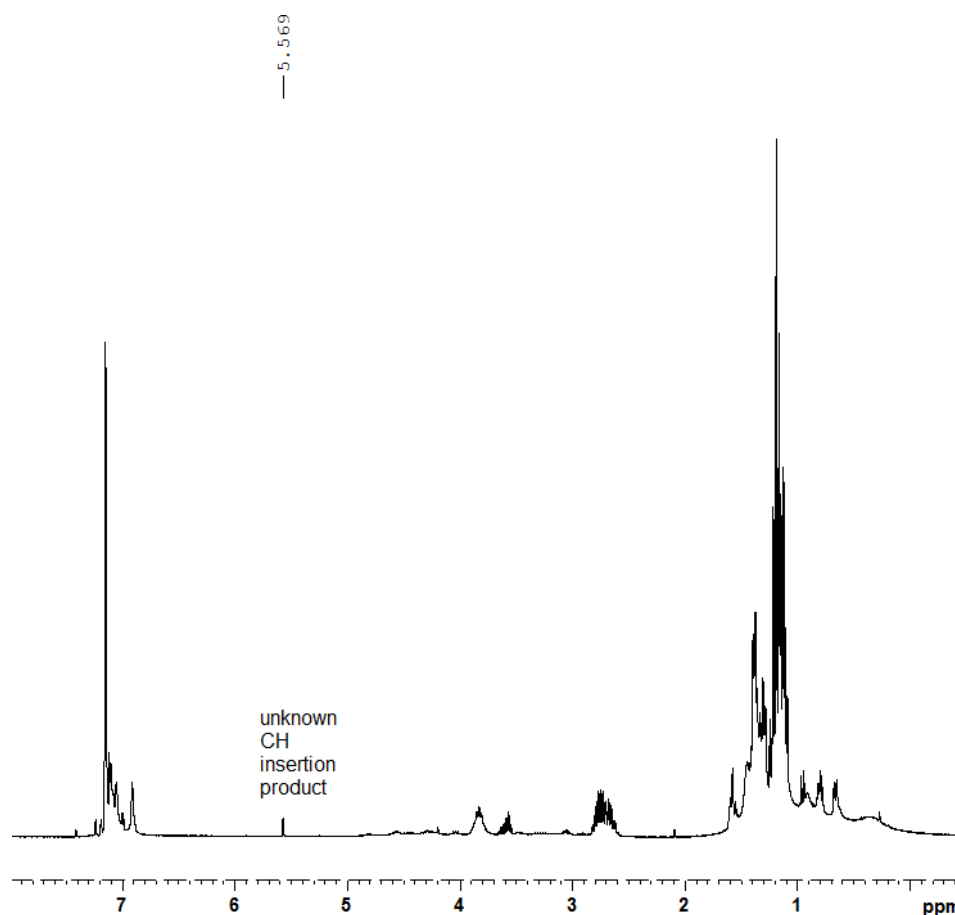

**Figure S10.**  $^1\text{H}$  NMR of mixture of **9**, **10** and an unknown CH insertion product in  $[\text{D}_6]$ -benzene at 300 K.

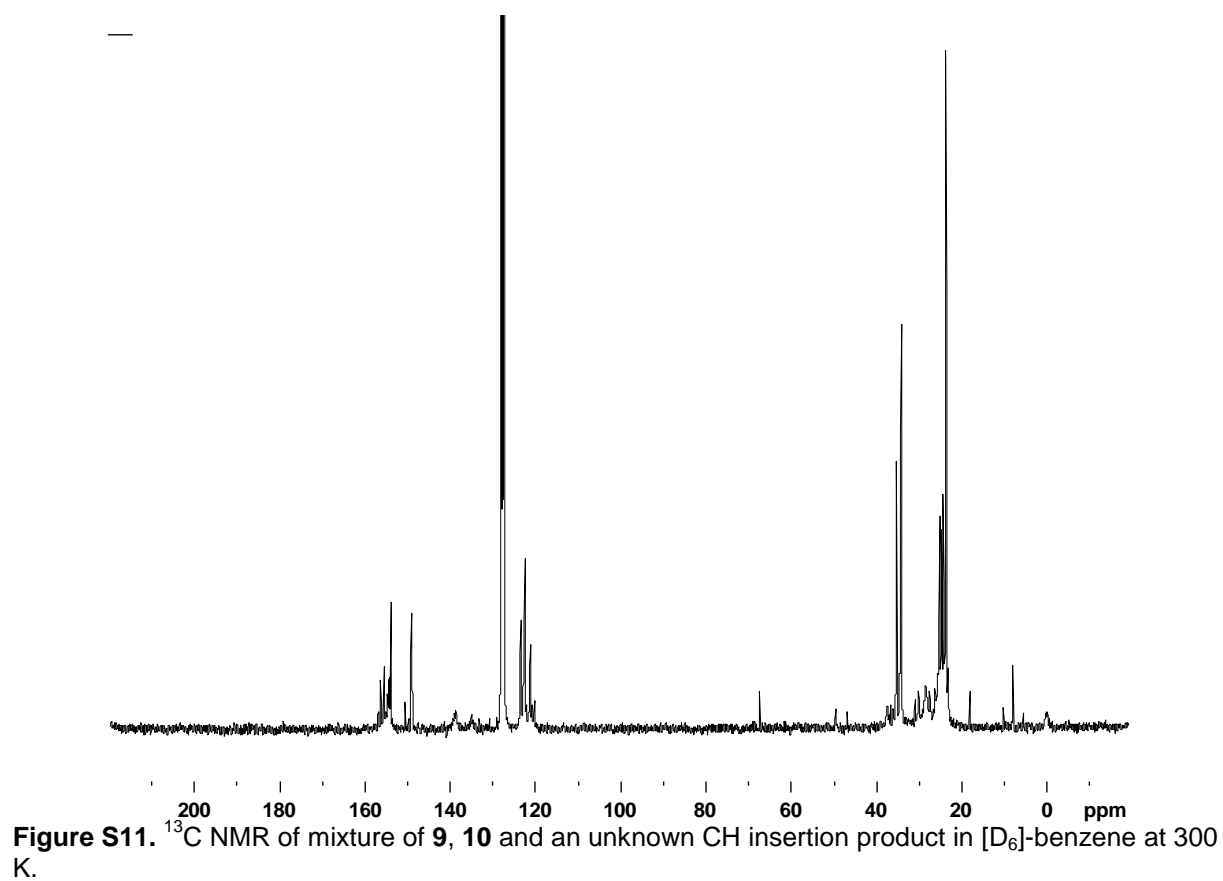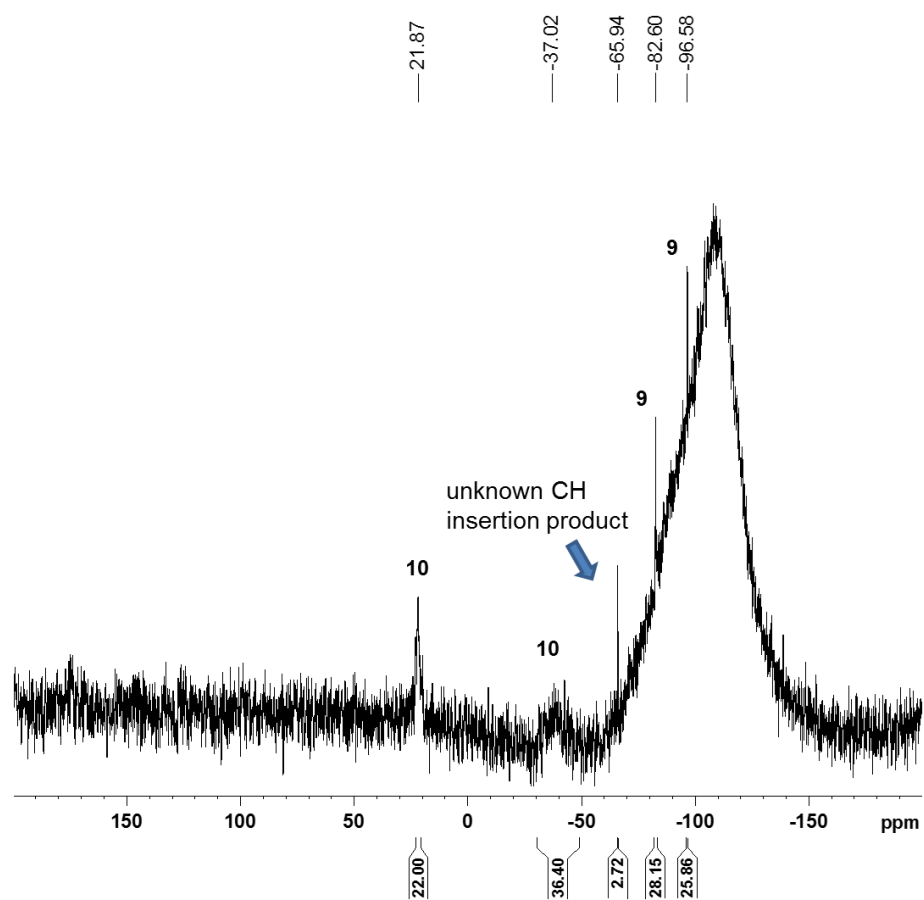

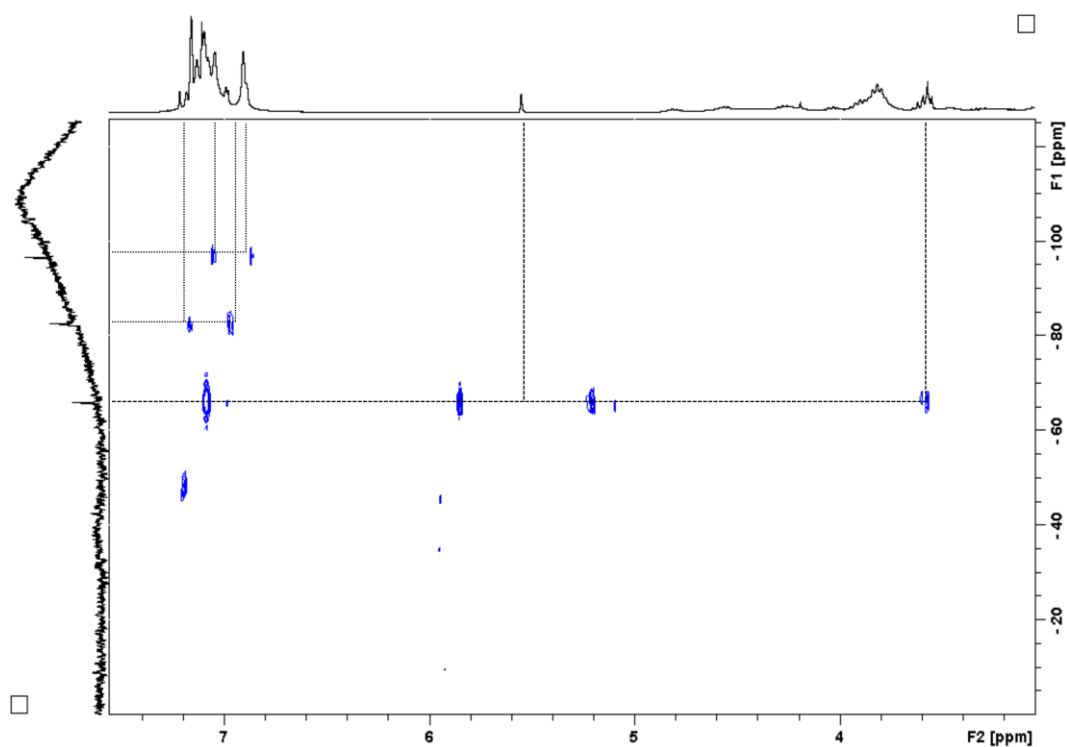

**Figure S13.**  $^{29}\text{Si}$ - $^1\text{H}$ -HMBC correlation of mixture of **9**, **10** and an unknown CH insertion product in  $[\text{D}_6]$ -benzene at 300 K.

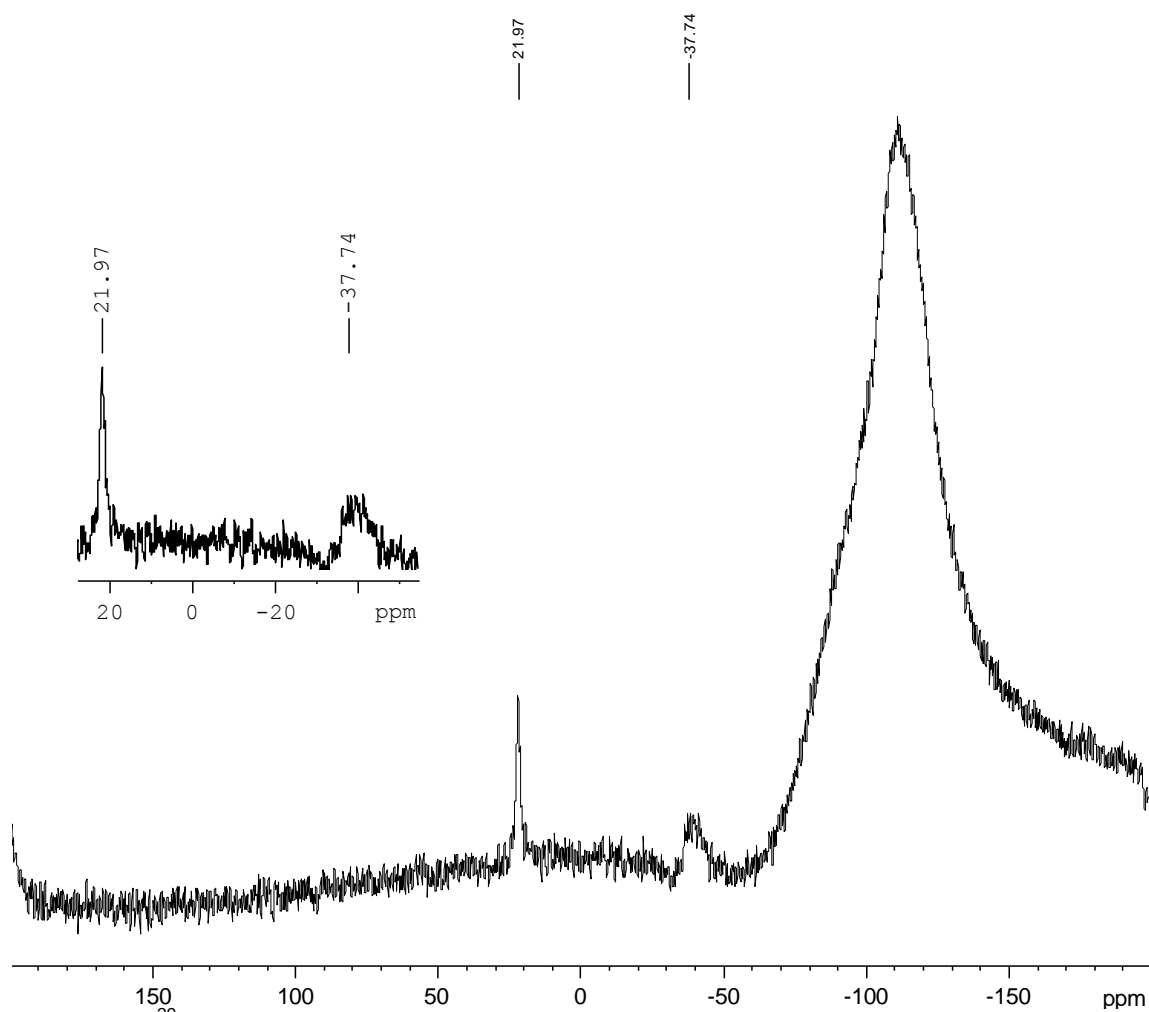

**Figure S14:**  $^{29}\text{Si}$  NMR of **10** in  $[\text{D}_6]$ -benzene at 300 K.

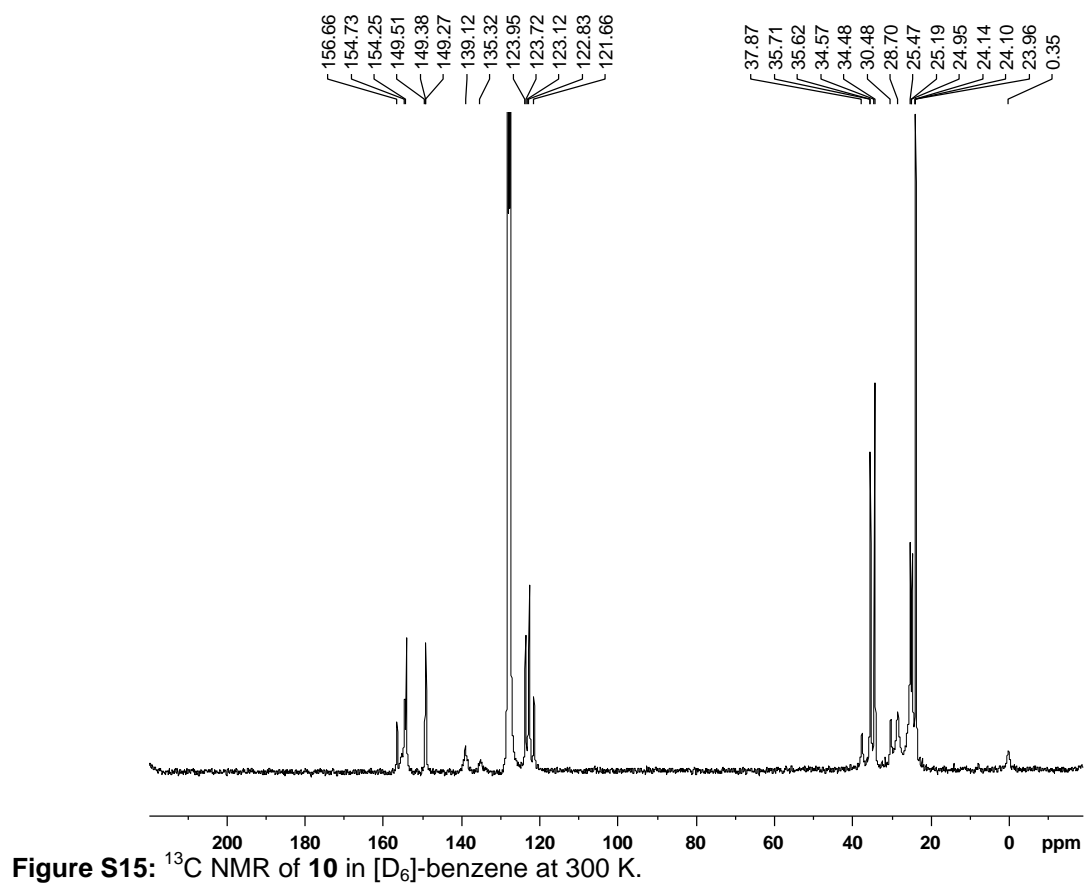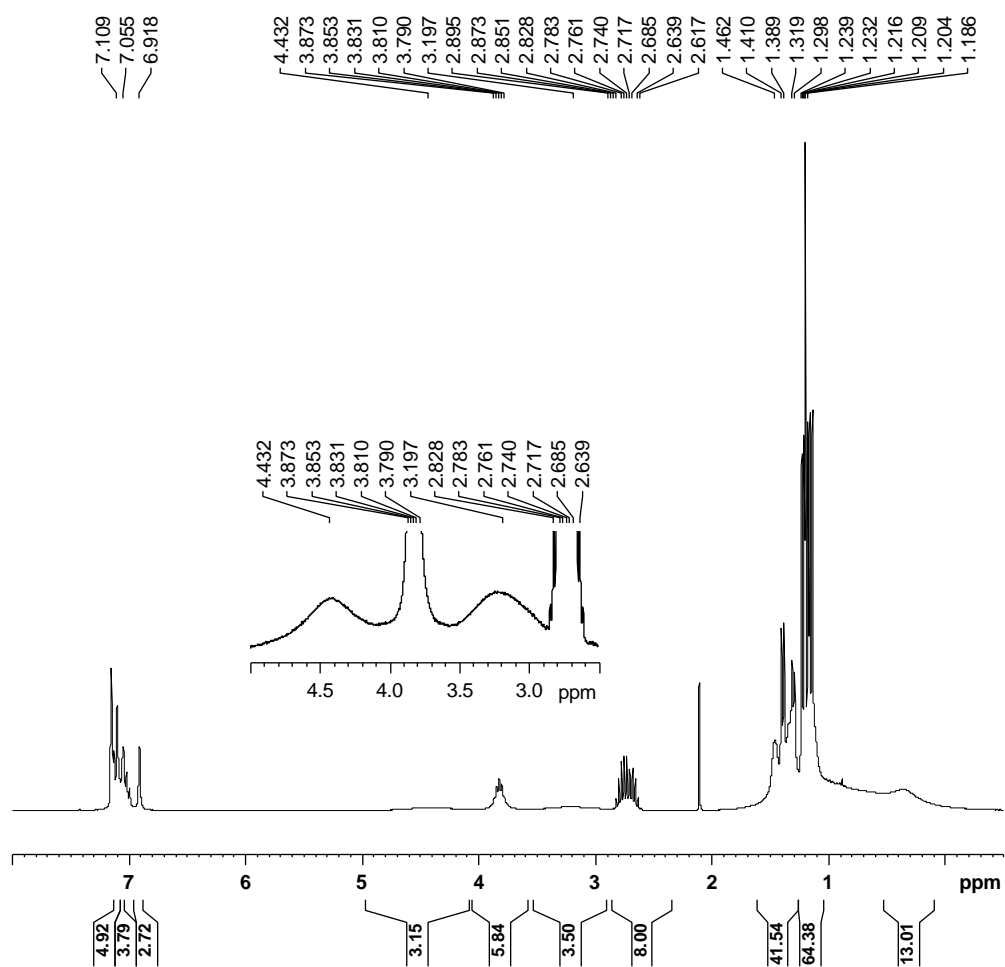

### 3. X-ray data

**Table S1:** Crystal data and structure refinement for **9**

|                                   |                                                                                                                                                                                    |
|-----------------------------------|------------------------------------------------------------------------------------------------------------------------------------------------------------------------------------|
| Identification code               | sh3530                                                                                                                                                                             |
| Empirical formula                 | C <sub>92</sub> H <sub>144</sub> Ge <sub>2</sub> Si <sub>4</sub> , C <sub>7</sub> H <sub>8</sub>                                                                                   |
| Formula weight                    | 1599.74                                                                                                                                                                            |
| Temperature                       | 152(2) K                                                                                                                                                                           |
| Wavelength                        | 0.71073 Å                                                                                                                                                                          |
| Crystal system                    | Triclinic                                                                                                                                                                          |
| Space group                       | P-1                                                                                                                                                                                |
| Unit cell dimensions              | $a = 16.3223(6) \text{ Å}$ $\alpha = 71.4780(19)^\circ$ .<br>$b = 17.6076(7) \text{ Å}$ $\beta = 77.6430(18)^\circ$ .<br>$c = 18.3797(8) \text{ Å}$ $\gamma = 67.4580(17)^\circ$ . |
| Volume                            | 4600.3(3) Å <sup>3</sup>                                                                                                                                                           |
| Z                                 | 2                                                                                                                                                                                  |
| Density (calculated)              | 1.155 Mg/m <sup>3</sup>                                                                                                                                                            |
| Absorption coefficient            | 0.749 mm <sup>-1</sup>                                                                                                                                                             |
| F(000)                            | 1732                                                                                                                                                                               |
| Crystal size                      | 0.303 x 0.248 x 0.210 mm <sup>3</sup>                                                                                                                                              |
| Theta range for data collection   | 1.297 to 27.210°.                                                                                                                                                                  |
| Index ranges                      | -20 ≤ h ≤ 20, -22 ≤ k ≤ 22, -23 ≤ l ≤ 23                                                                                                                                           |
| Reflections collected             | 77965                                                                                                                                                                              |
| Independent reflections           | 20276 [R(int) = 0.0508]                                                                                                                                                            |
| Completeness to theta = 25.242°   | 100.0 %                                                                                                                                                                            |
| Absorption correction             | Semi-empirical from equivalents                                                                                                                                                    |
| Max. and min. transmission        | 0.7455 and 0.7011                                                                                                                                                                  |
| Refinement method                 | Full-matrix least-squares on F <sup>2</sup>                                                                                                                                        |
| Data / restraints / parameters    | 20276 / 49 / 1051                                                                                                                                                                  |
| Goodness-of-fit on F <sup>2</sup> | 1.024                                                                                                                                                                              |
| Final R indices [I > 2σ(I)]       | R1 = 0.0488, wR2 = 0.1187                                                                                                                                                          |
| R indices (all data)              | R1 = 0.0828, wR2 = 0.1344                                                                                                                                                          |
| Extinction coefficient            | n/a                                                                                                                                                                                |
| Largest diff. peak and hole       | 1.332 and -0.616 e.Å <sup>-3</sup>                                                                                                                                                 |

**Table S2: Crystal data and structure refinement for 10**

|                                   |                                                                                                       |
|-----------------------------------|-------------------------------------------------------------------------------------------------------|
| Identification code               | sh3557                                                                                                |
| Empirical formula                 | C <sub>92</sub> H <sub>144</sub> Ge <sub>2</sub> Si <sub>4</sub> x 0.5 C <sub>7</sub> H <sub>8</sub>  |
| Formula weight                    | 1557.70                                                                                               |
| Temperature                       | 133(2) K                                                                                              |
| Wavelength                        | 0.71073 Å                                                                                             |
| Crystal system                    | Monoclinic                                                                                            |
| Space group                       | C2/c                                                                                                  |
| Unit cell dimensions              | a = 33.8499(14) Å    α = 90°.<br>b = 26.2285(14) Å    β = 97.911(2)°.<br>c = 20.2919(8) Å    γ = 90°. |
| Volume                            | 17844.3(14) Å <sup>3</sup>                                                                            |
| Z                                 | 8                                                                                                     |
| Density (calculated)              | 1.160 Mg/m <sup>3</sup>                                                                               |
| Absorption coefficient            | 0.771 mm <sup>-1</sup>                                                                                |
| F(000)                            | 6760                                                                                                  |
| Crystal size                      | 0.389 x 0.230 x 0.046 mm <sup>3</sup>                                                                 |
| Theta range for data collection   | 1.215 to 26.502°.                                                                                     |
| Index ranges                      | -42 ≤ h ≤ 42, -32 ≤ k ≤ 32, -25 ≤ l ≤ 15                                                              |
| Reflections collected             | 136792                                                                                                |
| Independent reflections           | 18398 [R(int) = 0.0917]                                                                               |
| Completeness to theta = 25.242°   | 99.9 %                                                                                                |
| Absorption correction             | Semi-empirical from equivalents                                                                       |
| Refinement method                 | Full-matrix least-squares on F <sup>2</sup>                                                           |
| Data / restraints / parameters    | 18398 / 110 / 987                                                                                     |
| Goodness-of-fit on F <sup>2</sup> | 1.011                                                                                                 |
| Final R indices [I > 2σ(I)]       | R1 = 0.0463, wR2 = 0.0951                                                                             |
| R indices (all data)              | R1 = 0.0883, wR2 = 0.1105                                                                             |
| Extinction coefficient            | n/a                                                                                                   |
| Largest diff. peak and hole       | 0.873 and -0.653 e.Å <sup>-3</sup>                                                                    |

## 4. Computational details

### Computational Method:

Gaussian 09 and GaussView 5.0 package programs were used for calculations and visualization.<sup>2,3</sup> The proposed mechanism for the formation of **9-Me** using simplified model system with methyl groups instead of Tip substituents (**5a-Me**) were calculated at B3LYP/6-31+G(d,p) level of theory (Figure S17). Frequency analyses were performed to determine the character of optimized structures as minima or transition states. The relative Gibbs free energies given in kcal/mol. The chemical reaction channels have been checked by the intrinsic reaction coordinate (IRC) method to verify the energy profiles at the B3LYP/6-31+G(d,p) level of theory for the processes from transition states to intermediates.<sup>4</sup>

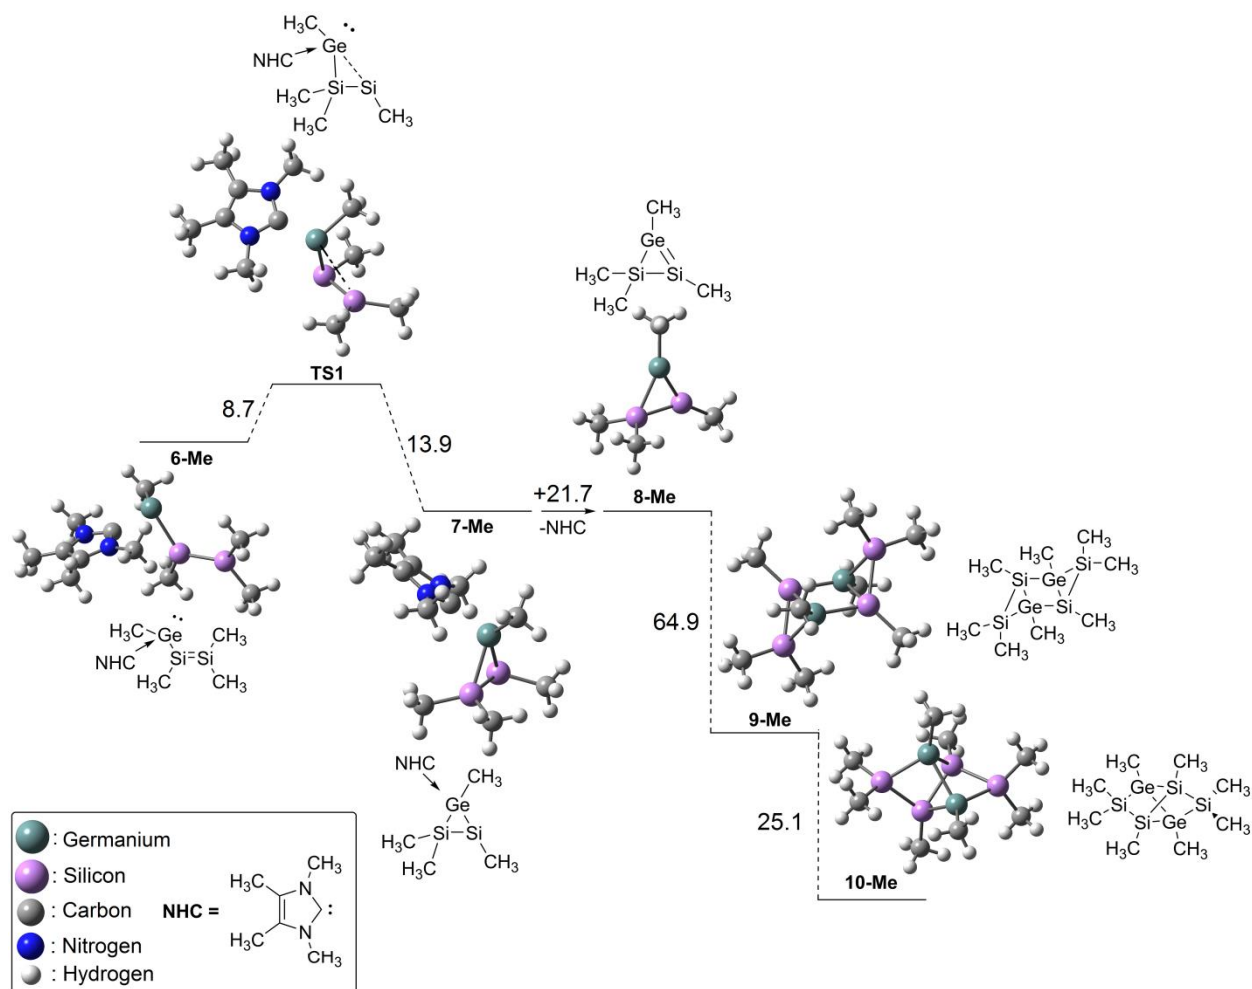

**Figure S17.** Proposed mechanism and intermediates for the formation of **9-Me** using simplified model system with methyl groups instead of Tip substituents at B3LYP/6-31+G(d,p) level of theory.  $\Delta G$  energy values at 298 K are given in kcal mol<sup>-1</sup>

An intrinsic reaction coordinate (IRC) calculation has been carried out to investigate the energy profile between the proposed van der Waals complex of two molecules of **8-Me** (step 1) and the dimer **9-Me** (step 201) at B3LYP/6-31G(d) level of theory. As can be seen from Figure S18, the isomerization from step 1 to **9-Me** (step 201) passes from point 0.0 to point 20.1 with the step size of 0.1. In step 42, the formation of Si-Ge single bonds between two **8-Me** molecules takes place. Then, rearrangement of SiGeSiGe four-membered ring to **9-Me** occurs strongly suggesting that dimerization of the **8-Me** to the **9-Me** proceeds without energy barrier.



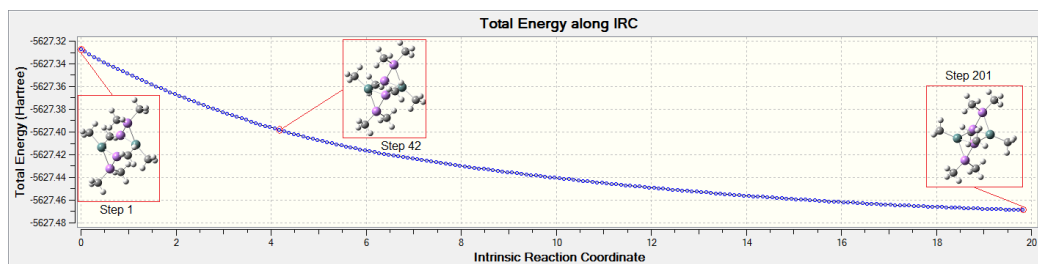

**Figure S18.** The IRC plot for the formation of **9-Me** at B3LYP/6-31+G(d,p) level of theory.

**Table S3.** Cartesian coordinates and energy values for the **6-Me**.

```

Ge,-0.5065990848,1.0092206313,-1.0790815417
Si,1.4074397086,-0.5150371844,-1.1185964953
Si,3.412342328,0.2631872176,-1.3879442254
N,-2.4169076423,-0.6418844761,0.8168568176
N,-0.8414587631,0.4567705971,1.7954698993
C,-1.3230486356,0.1295811154,0.5602128693
C,-2.6025640192,-0.8188227837,2.1903156996
C,-1.6036400773,-0.1239979116,2.8086167792
C,-3.7332494812,-1.610317417,2.7593970284
H,-3.6717450574,-1.6234514549,3.8495152139
H,-3.721765796,-2.6518323693,2.4165012166
H,-4.7075509866,-1.1856623035,2.4887044825
C,-1.2953443743,0.0484817598,4.2594114645
H,-1.9916574119,-0.5377875325,4.8628205468
H,-1.3843301376,1.094154284,4.5775658939
H,-0.2812549205,-0.2884310815,4.5028665743
C,-1.5479080202,0.2655856354,-2.6603763204
H,-2.5780111627,0.6413411461,-2.6665018986
H,-1.0418143395,0.7077209827,-3.5250682202
H,-1.551124449,-0.8199183927,-2.804230132
C,1.2153422806,-2.4070895287,-1.4086778332
H,2.1830478876,-2.8935505073,-1.5715717668
H,0.7401622454,-2.8787605627,-0.540909097
H,0.5852145448,-2.604899747,-2.2832725653
C,4.9831857893,-0.7917948505,-1.5809366041
H,5.5396642993,-0.5009001396,-2.4799344342
H,5.6522021198,-0.6694267939,-0.7208603754
H,4.7332460348,-1.853576636,-1.6686798006
C,3.8179038299,2.1046468657,-1.1703889942
H,4.3565531432,2.4900522945,-2.0443703108
H,2.894051854,2.6809595132,-1.0616736506
H,4.4454201526,2.2822109482,-0.2888258783
C,0.3385012964,1.2877321281,2.0081473419
H,1.2490906385,0.7199528153,1.7924604692
H,0.2966702968,2.1392480578,1.3228714367
H,0.3509122532,1.6407718728,3.039303584
C,-3.2677468273,-1.265920646,-0.1870568936
H,-3.2584128966,-2.3538464497,-0.0690939433
H,-4.2970638767,-0.9059706002,-0.0938340405
H,-2.8873079637,-1.0102670574,-1.1698781224

```

|                                              |                             |
|----------------------------------------------|-----------------------------|
| Zero-point correction=                       | 0.334345 (Hartree/Particle) |
| Thermal correction to Energy=                | 0.359206                    |
| Thermal correction to Enthalpy=              | 0.360150                    |
| Thermal correction to Gibbs Free Energy=     | 0.277969                    |
| Sum of electronic and zero-point Energies=   | -3196.851527                |
| Sum of electronic and thermal Energies=      | -3196.826666                |
| Sum of electronic and thermal Enthalpies=    | -3196.825722                |
| Sum of electronic and thermal Free Energies= | -3196.907903                |

**Table S4.** Cartesian coordinates and energy values for the **7-Me**.

Ge,5.8961948656,9.7818937202,3.0748212799  
Si,5.2150924208,9.8862958857,5.4616240178  
Si,6.8757139622,8.3341370567,4.7344747866  
N,8.1606014729,11.1111075471,1.6703560107  
N,7.0658015325,12.5327908473,2.8775326961  
C,7.0975658901,11.224150645,2.5144109605  
C,8.0985052077,13.239989418,2.2656372682  
C,8.7896328367,12.3421594143,1.498105357  
C,8.3156284652,14.7032292703,2.4680708608  
H,8.5783689849,14.9384290894,3.5061248735  
H,7.4246270182,15.286788156,2.2105514479  
H,9.1343725916,15.0510463379,1.8349190809  
C,9.9826964394,12.5239526154,0.6190878133  
H,10.2597741295,13.5791655395,0.5732257034  
H,9.7861844222,12.1870485979,-0.405277465  
H,10.8551459999,11.9718249847,0.9887902575  
C,6.6236461164,6.4718226102,4.3706577606  
H,6.8170327445,5.8802853857,5.2744262194  
H,5.5970008618,6.2622081657,4.0527449486  
H,7.3015098,6.1164890396,3.5851178399  
C,3.5514839864,8.8519969855,5.5004806564  
H,3.3989076603,8.4908507267,6.525805979  
H,2.7067201064,9.5082046831,5.2584963224  
H,3.5053264438,7.9840307015,4.8339014389  
C,8.6949095632,8.6069097979,5.2504889537  
H,8.9178220831,8.0519397971,6.1711370817  
H,9.3959880474,8.2710529663,4.4769966769  
H,8.8835145013,9.6669960906,5.4500857893  
C,5.1753353721,8.9936910508,1.3937509153  
H,4.6210191254,9.7442086259,0.8228927597  
H,5.9377296459,8.5417664413,0.7520564372  
H,4.4730018453,8.2105934262,1.6923934589  
C,8.6027334484,9.8518038698,1.0846930164  
H,8.283810214,9.0427604514,1.747958259  
H,8.1642356587,9.7017687885,0.0936865843  
H,9.690850246,9.8484562015,1.0027448425  
C,6.0392138388,13.1306381795,3.7329294724  
H,5.1775499458,13.4364365923,3.131422134  
H,5.718708485,12.3973468046,4.4797400286  
H,6.4592523805,14.001149313,4.237710356

|                                              |                             |
|----------------------------------------------|-----------------------------|
| Zero-point correction=                       | 0.334376 (Hartree/Particle) |
| Thermal correction to Energy=                | 0.358875                    |
| Thermal correction to Enthalpy=              | 0.359820                    |
| Thermal correction to Gibbs Free Energy=     | 0.280186                    |
| Sum of electronic and zero-point Energies=   | -3196.861945                |
| Sum of electronic and thermal Energies=      | -3196.837446                |
| Sum of electronic and thermal Enthalpies=    | -3196.836502                |
| Sum of electronic and thermal Free Energies= | -3196.916136                |

**Table S5.** Cartesian coordinates and energy values for the **8-Me**.

Ge,6.4235781086,9.6348853824,3.2043655318  
Si,5.2298385049,9.528178367,5.0326043759  
Si,6.9239637895,7.9702379154,4.8406302323  
C,6.5920258909,6.1295965985,4.4997181938  
H,6.4967335304,5.5718607611,5.4402988285  
H,5.6732323503,5.9940234526,3.9226672391  
H,7.4223889811,5.68648114,3.9355984286  
C,8.5195143286,8.0568997421,5.8707427502  
H,8.4117947788,7.4854036988,6.8016756481  
H,9.3612096862,7.6258902925,5.3140789752  
H,8.7693673691,9.0902629273,6.1262268901  
C,6.7617173712,10.5186926815,1.4874017786  
H,6.6519086003,9.8009710509,0.6704310025  
H,6.0431208217,11.3308315916,1.354522018  
H,7.7757033712,10.9263681984,1.4712127649  
C,3.8128181301,10.1608553641,6.135959011  
H,3.0792390381,9.3662371189,6.3071566577  
H,4.2020620302,10.4887398732,7.1054230239  
H,3.3087477087,11.0057977835,5.6568864199

|                                              |                             |
|----------------------------------------------|-----------------------------|
| Zero-point correction=                       | 0.148872 (Hartree/Particle) |
| Thermal correction to Energy=                | 0.162465                    |
| Thermal correction to Enthalpy=              | 0.163409                    |
| Thermal correction to Gibbs Free Energy=     | 0.107277                    |
| Sum of electronic and zero-point Energies=   | -2813.521911                |
| Sum of electronic and thermal Energies=      | -2813.508318                |
| Sum of electronic and thermal Enthalpies=    | -2813.507374                |
| Sum of electronic and thermal Free Energies= | -2813.563506                |

**Table S6.** Cartesian coordinates and energy values for the **9-Me**.

Ge,1.6211681006,0.2898488733,-0.3831745448  
Si,0.3063955841,0.0958610424,1.6971451591  
Si,1.8994638773,-1.5163226356,1.166794066  
C,1.3890645213,-3.2845670533,0.7142921896  
H,1.3369129465,-3.9222246453,1.605202639  
H,0.4003221628,-3.2672653155,0.2461465971  
H,2.0982325155,-3.733537569,0.0093077878  
C,3.5430093657,-1.4565474945,2.1189826745

H,3.4786569533,-2.0280544798,3.0520983308  
 H,4.3489908946,-1.8851631827,1.5124637294  
 H,3.8229028522,-0.4286705431,2.3712328682  
 Si,-0.3063873056,-0.0957841158,-1.6970817996  
 Ge,-1.6211149172,-0.2897678038,0.3832052913  
 Si,-1.8995949544,1.5163040497,-1.1668260479  
 C,-1.3892460404,3.2845730734,-0.7143789494  
 H,-0.400581665,3.267261172,-0.2460674208  
 H,-1.3369234801,3.922207483,-1.6052928091  
 H,-2.0985252244,3.7335627608,-0.0095163321  
 C,-3.5430943918,1.4564625111,-2.119086501  
 H,-4.3491106722,1.8850518868,-1.5125919278  
 H,-3.4786800257,2.0280225995,-3.0521655148  
 H,-3.8229727792,0.4286013215,-2.37140962  
 C,-0.2849596996,-1.2331367416,-3.2256918436  
 H,0.1530639128,-2.2005079513,-2.9595846784  
 H,-1.2989528245,-1.402304038,-3.6024157108  
 H,0.3136783785,-0.7955298324,-4.0318252481  
 C,-3.0499984496,-1.5704606658,0.8079189267  
 H,-2.6173254599,-2.5430512015,1.0562401133  
 H,-3.630548515,-1.2121082611,1.6620745555  
 H,-3.7204256692,-1.6864716148,-0.04778193  
 C,3.0500691463,1.5704249682,-0.8081648325  
 H,3.6302021605,1.2121975091,-1.6626579229  
 H,2.617397427,2.5431185736,-1.0560936794  
 H,3.7208836945,1.6861711954,0.0472652927  
 C,0.2851354981,1.2328959141,3.2259749808  
 H,-0.3131389632,0.7949967417,4.0322200804  
 H,1.299227681,1.4021642139,3.6023939161  
 H,-0.1531486894,2.2002551141,2.9602538389

|                                              |                             |
|----------------------------------------------|-----------------------------|
| Zero-point correction=                       | 0.301397 (Hartree/Particle) |
| Thermal correction to Energy=                | 0.328845                    |
| Thermal correction to Enthalpy=              | 0.329789                    |
| Thermal correction to Gibbs Free Energy=     | 0.243887                    |
| Sum of electronic and zero-point Energies=   | -5627.172949                |
| Sum of electronic and thermal Energies=      | -5627.145501                |
| Sum of electronic and thermal Enthalpies=    | -5627.144557                |
| Sum of electronic and thermal Free Energies= | -5627.230459                |

**Table S7.** Cartesian coordinates and energy values for the **10-Me**.

Ge,7.9451774912,8.8232858417,6.8842984089  
 Ge,7.2643820869,11.2015826787,6.7492810088  
 Si,6.6443365868,9.0365330986,4.8354331897  
 Si,8.3413069705,10.6873005448,4.6253113778  
 Si,5.1320491154,10.5423575469,5.8434501129  
 Si,9.9639046009,9.3298581025,5.6717453637  
 C,7.6342766226,7.6020071956,8.388005217  
 H,7.9141514575,6.5836902762,8.105979579  
 H,6.5794440048,7.6151302485,8.6736076806  
 H,8.2398917002,7.9125961123,9.2431873093

C,7.7244397264,12.6230234831,8.0209599714  
 H,7.4084374896,13.5926852315,7.6276049962  
 H,8.8037614831,12.6426144099,8.1915159491  
 H,7.2157539783,12.4426864749,8.9713809928  
 C,3.8779359025,9.8268041706,7.0836454993  
 H,3.0440841793,9.3283777149,6.5746325077  
 H,4.3617361857,9.0963060286,7.7402113477  
 H,3.4569645332,10.6191866321,7.7144735084  
 C,4.2398246579,11.790092629,4.7156982871  
 H,3.3970730728,11.3212696619,4.1929443845  
 H,3.8457269287,12.6339723528,5.2943992438  
 H,4.9249988872,12.1896254301,3.9606987331  
 C,6.3152455056,7.6189308611,3.6035197496  
 H,5.6595778604,6.8622426833,4.0465333062  
 H,5.8414098267,7.9929944331,2.6897436685  
 H,7.2575459679,7.1347496388,3.3267593342  
 C,8.526590209,11.9113417544,3.1751659264  
 H,8.9038150927,11.4067363796,2.2793390942  
 H,7.5564416699,12.3578175335,2.9334482791  
 H,9.2195136281,12.7188328554,3.4331495169  
 C,11.3371215326,10.2064334567,6.6560092496  
 H,11.8294783922,9.5095507236,7.3451878926  
 H,12.1078152493,10.620914251,5.9948948871  
 H,10.9200372735,11.0268144496,7.249120776  
 C,10.7407496095,7.9266611305,4.6459469351  
 H,11.5195243552,8.3091868569,3.9747731998  
 H,11.2005593997,7.1713497987,5.2943460427  
 H,9.982182486,7.4284191484,4.033208183

|                                              |                             |
|----------------------------------------------|-----------------------------|
| Zero-point correction=                       | 0.302611 (Hartree/Particle) |
| Thermal correction to Energy=                | 0.329053                    |
| Thermal correction to Enthalpy=              | 0.329997                    |
| Thermal correction to Gibbs Free Energy=     | 0.248353                    |
| Sum of electronic and zero-point Energies=   | -5627.216198                |
| Sum of electronic and thermal Energies=      | -5627.189756                |
| Sum of electronic and thermal Enthalpies=    | -5627.188812                |
| Sum of electronic and thermal Free Energies= | -5627.270455                |

**Table S8.** Cartesian coordinates and energy values for the **NHC**.

N,8.3628548283,11.2564945749,1.6314502008  
 N,7.4211317749,12.550457475,3.030803469  
 C,7.5951035039,11.2213434393,2.7621139316  
 C,8.0554174287,13.3893252669,2.1043751759  
 C,8.6603347753,12.5581676152,1.2055614673  
 C,8.009594245,14.8804902841,2.1859111762  
 H,8.4457694755,15.2543406092,3.1207843875  
 H,6.9828663941,15.2634259553,2.1298825654  
 H,8.5711793139,15.3262037394,1.3609002771  
 C,9.4834419094,12.8543725315,-0.0056945158  
 H,9.5872307132,13.9337097231,-0.1431986115  
 H,9.0309381982,12.4481817616,-0.9190781593

H,10.493962549,12.4338653765,0.0715939085  
 C,8.8133753545,10.0504712288,0.9560822829  
 H,8.427239021,9.2001916865,1.5178415623  
 H,8.4331890801,10.0071297746,-0.0705988458  
 H,9.9074400754,9.9980126669,0.9288835858  
 C,6.6508239157,13.0221900728,4.1699757884  
 H,5.7982406193,13.629501437,3.8462558049  
 H,6.2845479776,12.1435408437,4.7005034344  
 H,7.2717730771,13.6195016176,4.8468122444

|                                              |                             |
|----------------------------------------------|-----------------------------|
| Zero-point correction=                       | 0.182237 (Hartree/Particle) |
| Thermal correction to Energy=                | 0.192412                    |
| Thermal correction to Enthalpy=              | 0.193356                    |
| Thermal correction to Gibbs Free Energy=     | 0.147620                    |
| Sum of electronic and zero-point Energies=   | -383.283383                 |
| Sum of electronic and thermal Energies=      | -383.273209                 |
| Sum of electronic and thermal Enthalpies=    | -383.272265                 |
| Sum of electronic and thermal Free Energies= | -383.318001                 |

**Table S9.** Cartesian coordinates and energy values for the **TS1**.

Ge,4.6447208861,9.7637063656,6.8500689327  
 Si,5.215949946,7.2165231038,6.5344559248  
 Si,6.542901525,8.1630950818,5.0059809261  
 N,2.5553493442,9.2641319309,9.1627360251  
 N,4.6336275961,9.1609158077,9.7305774781  
 C,3.8168111585,9.2964582829,8.6441542354  
 C,2.5815704258,9.0903353348,10.5490506962  
 C,3.8968507409,9.0206465526,10.9058036899  
 C,1.3454590647,9.0222986017,11.3833689637  
 H,1.6091019555,8.8817243133,12.4336272365  
 H,0.6959947347,8.1877521372,11.092467598  
 H,0.7513992989,9.9415599475,11.3122343612  
 C,4.5297421231,8.833579264,12.2452514182  
 H,3.7601449616,8.7016949067,13.0088243199  
 H,5.1380126403,9.6978818612,12.5378025021  
 H,5.1755226796,7.9483191241,12.2695064538  
 C,3.0662435683,9.9351655965,5.5831711035  
 H,2.4215477639,10.7753294014,5.8678889765  
 H,3.5279606296,10.200281304,4.6253753123  
 H,2.4539721416,9.0432789388,5.4143520369  
 C,3.7845783055,6.3504235697,5.5253149325  
 H,3.5417040771,6.8158087941,4.5645600368  
 H,4.0492246674,5.3027718777,5.3380419763  
 H,2.8725811161,6.3495982691,6.1345887891  
 C,6.5453556077,8.1086954945,3.1009523899  
 H,6.5520074269,9.1274228946,2.6925624147  
 H,7.4449701057,7.602910156,2.7262433939  
 H,5.6690831815,7.5849525097,2.7082920913  
 C,8.0848802586,9.1322563588,5.5299955625  
 H,8.1966817102,9.1543185667,6.617008963

H,8.9861921856,8.6805886882,5.0961517283  
H,8.0279183685,10.1680875605,5.1736701275  
C,6.0892567933,9.14425446,9.6514588715  
H,6.433931903,8.1878311725,9.2462518659  
H,6.4142015957,9.9430684178,8.977983507  
H,6.5066752459,9.3053727348,10.64545664  
C,1.320575141,9.3342681915,8.394585355  
H,0.6972074452,8.4600948748,8.604130664  
H,0.7599236503,10.2406243829,8.6454467371  
H,1.5691991904,9.3496455795,7.3391888431

Zero-point correction= 0.333531 (Hartree/Particle)  
Thermal correction to Energy= 0.357632  
Thermal correction to Enthalpy= 0.358576  
Thermal correction to Gibbs Free Energy= 0.279328  
Sum of electronic and zero-point Energies= -3196.839801  
Sum of electronic and thermal Energies= -3196.815699  
Sum of electronic and thermal Enthalpies= -3196.814755  
Sum of electronic and thermal Free Energies= -3196.894004

**Table S10.** Imaginary frequencies and vibrational frequencies ( $\text{cm}^{-1}$ ) of optimized structures at B3LYP/6-31+G(d,p).

|                                | 6     | 7     | 8     | 9     | 10    | NHC    | TS1    |
|--------------------------------|-------|-------|-------|-------|-------|--------|--------|
| <b>Vibrational Frequencies</b> | 21.07 | 18.70 | 45.68 | 32.64 | 54.56 | 122.51 | -84.97 |
| <b>Imaginary Frequencies</b>   | 0     | 0     | 0     | 0     | 0     | 0      | 1      |

## 5. Literature references

- 1 A. Jana, M. Majumdar, V. Huch, M. Zimmer and D. Scheschkewitz, *Dalton Trans.*, 2014, **43**, 5175–5181.
- 2 M. J. Frisch, G. W. Trucks, H. B. Schlegel, G. E. Scuseria, M. A. Robb, J. R. Cheeseman, G. Scalmani, V. Barone, B. Mennucci, G. A. Petersson, H. Nakatsuji, M. Caricato, X. Li, H. P. Hratchian, A. F. Izmaylov, J. Bloino, G. Zheng, J. L. Sonnenberg, M. Hada, M. Ehara, K. Toyota, R. Fukuda, J. Hasegawa, M. Ishida, T. Nakajima, Y. Honda, O. Kitao, H. Nakai, T. Vreven, J. A. Montgomery, Jr., J. E. Peralta, F. Ogliaro, M. Bearpark, J. J. Heyd, E. Brothers, K. N. Kudin, V. N. Staroverov, R. Kobayashi, J. Normand, K. Raghavachari, A. Rendell, J. C. Burant, S. S. Iyengar, J. Tomasi, M. Cossi, N. Rega, J. M. Millam, M. Klene, J. E. Knox, J. B. Cross, V. Bakken, C. Adamo, J. Jaramillo, R. Gomperts, R. E. Stratmann, O. Yazyev, A. J. Austin, R. Cammi, C. Pomelli, J. W. Ochterski, R. L. Martin, K. Morokuma, V. G. Zakrzewski, G. A. Voth, P. Salvador, J. J. Dannenberg, S. Dapprich, A. D. Daniels, Ö. Farkas, J. B. Foresman, J. V. Ortiz, J. Cioslowski, and D. J. Fox, Gaussian, Inc., Wallingford CT, Gaussian 09, Revision A.02, 2009.
- 3 R. Dennington, T. Keith, J. Millam, *Semichem Inc.*, Shawnee Mission, KS, GaussView, Version 5, 2009.
- 4 K. Fukui, *Acc. Chem. Res.*, 1981, **14**, 363–368.
